# Supplementary material for: Insights into HIV-1 Transmission Dynamics Using Routinely Collected Data in the Mid-Atlantic United States
Source: MDPI journal article supplement (doi:10.3390/v15010068), 2022-12-25
Supplement: s1 [file s1]

**Figure S1.** Frequency of major reverse transcriptase and protease mutations in B and Non-B Subtype HIV-1.

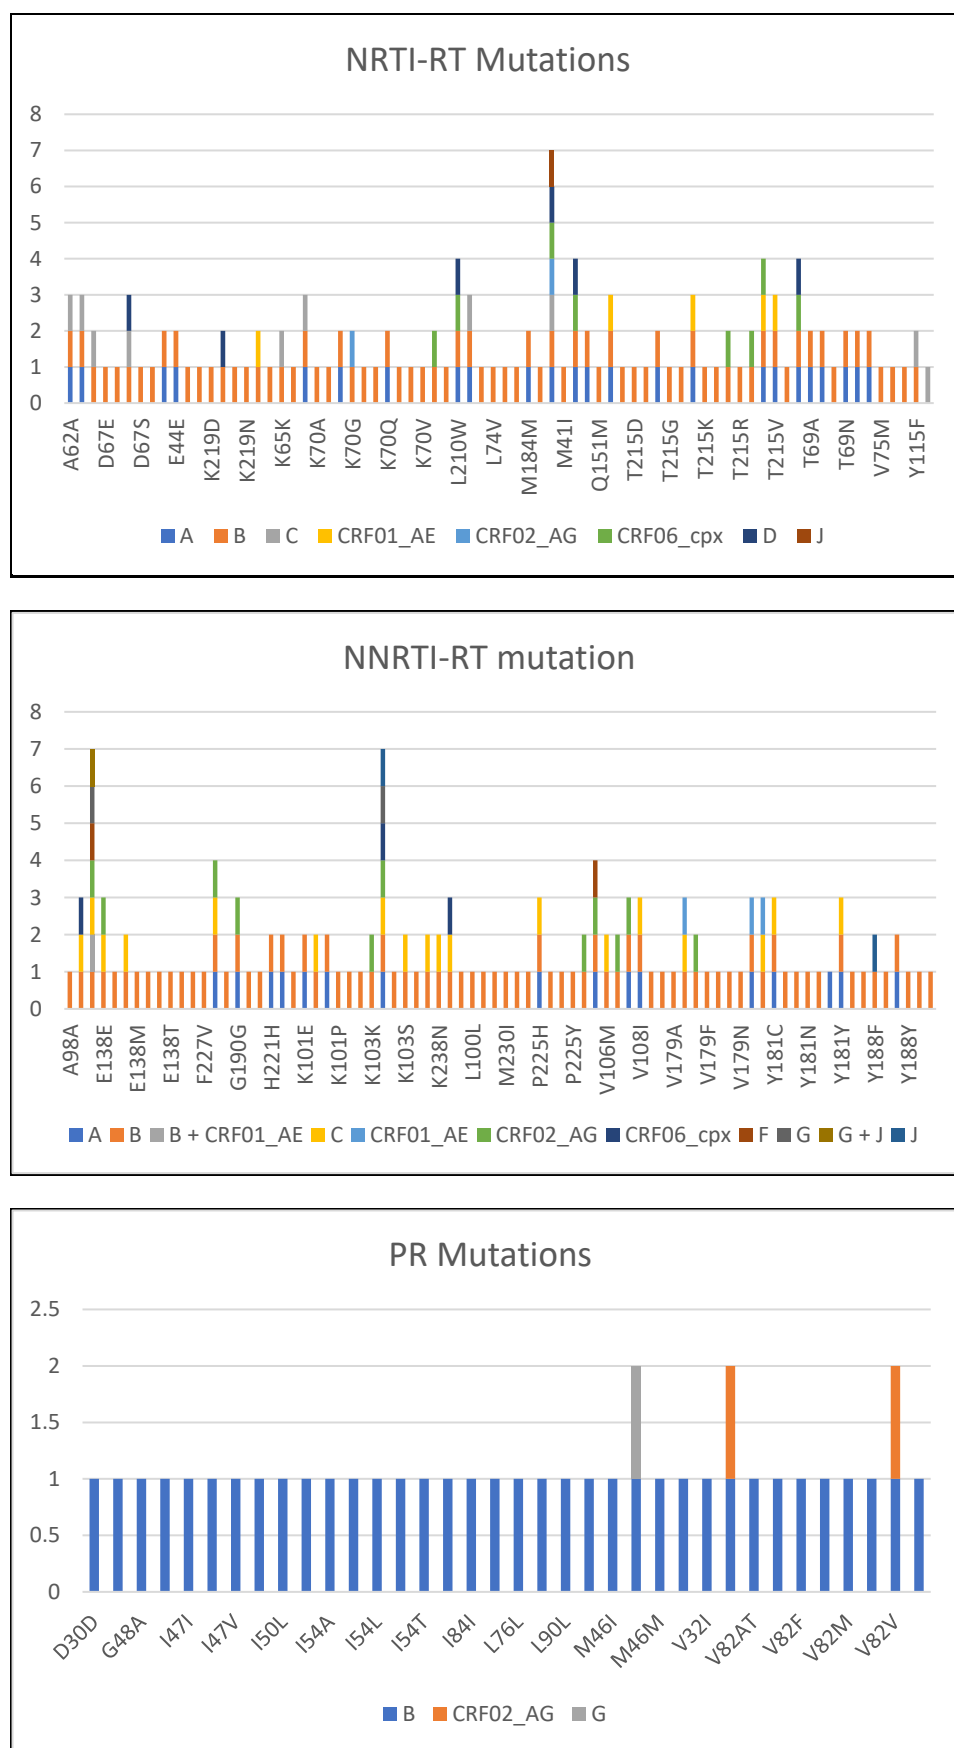

NRTI: nucleoside reverse transcriptase inhibitor.

NNRTI: non-nucleoside reverse transcriptase inhibitor.

PR: protease inhibitor.

RT: Reverse transcriptase.
